# Supplementary material for: Two novel porous MOFs with square-shaped cavities for the removal of toxic dyes: adsorption or degradation?
Source: Royal Society of Chemistry journal article supplement (doi:10.1039/c7nj02904g), 2017-01-01
Supplement: c7nj02904g1.pdf [file c7nj02904g1.pdf]

## **Two novel porous MOFs with square-shaped cavities for removing toxic dyes: adsorption or degradation?**

Huijun Li, Qingqing Li, Yaling He, Zhouqing Xu\* Qingjie Tang\*  
College of Chemistry and Chemical Engineering, Henan Polytechnic University,  
Jiaozuo, 454000, China.

E-mail: [zhqxu@hpu.edu.cn](mailto:zhqxu@hpu.edu.cn). [tqj503602@163.com](mailto:tqj503602@163.com).

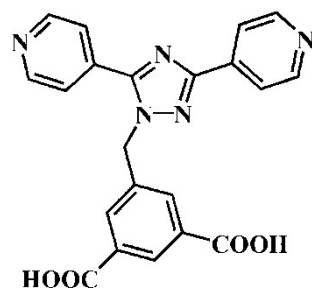

**Scheme S1.** The ligand used in this article.

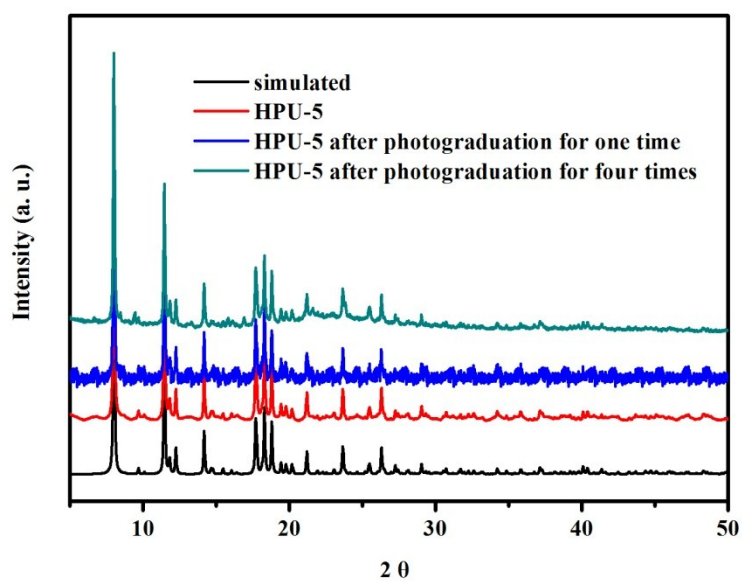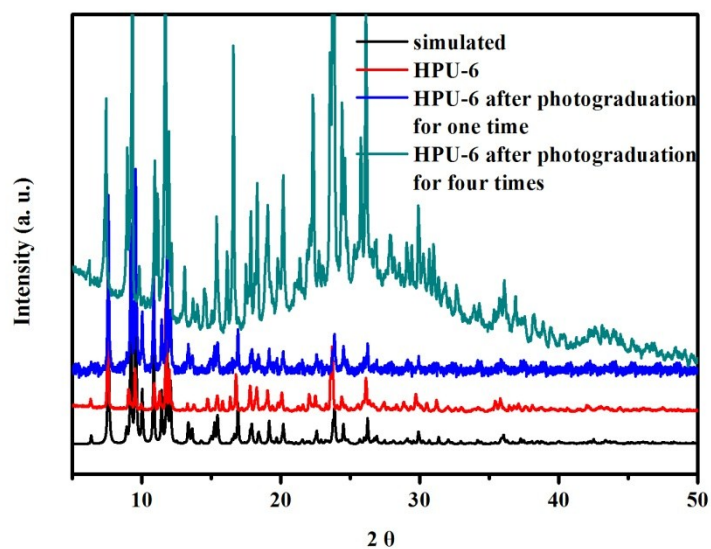

**Figure S1** the XRD patterns of **HPU-5** and **HPU-6**.

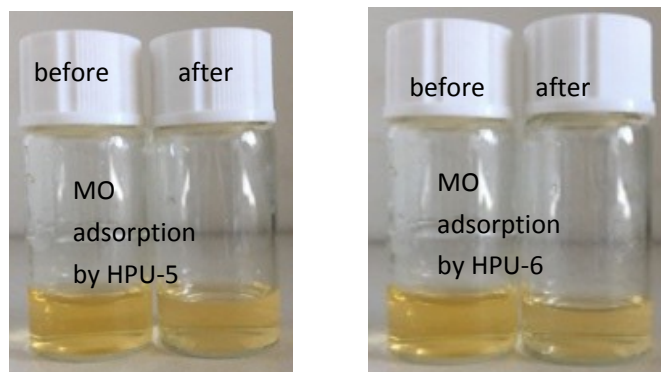

Figure S2 The photographs of MO solutions (before and after-adsorption by the two complexes).

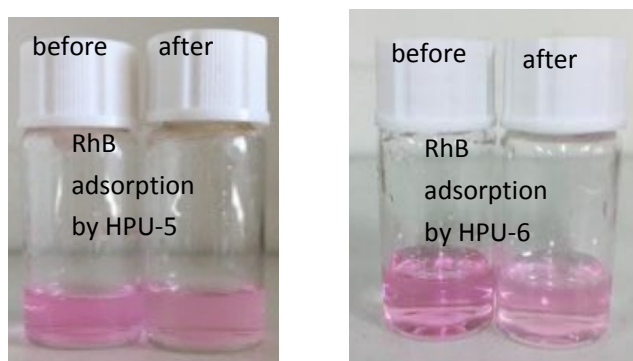

Figure S3 The photographs of RhB solutions (before and after-adsorption by the two complexes)

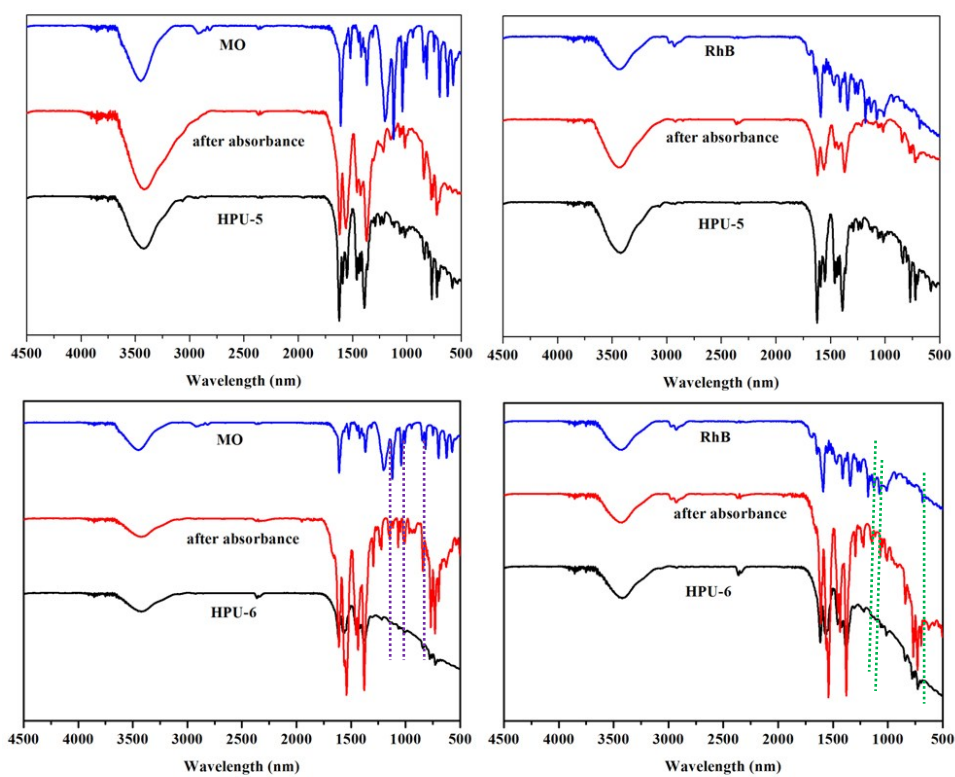

Figure S4 The IR spectra of respective products.

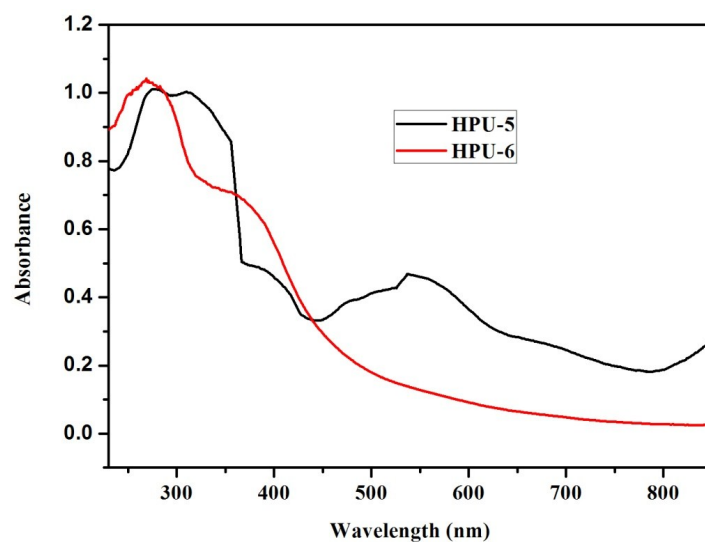

Figure S5 The UV-spectra of **HPU-5** and **HPU-6**.

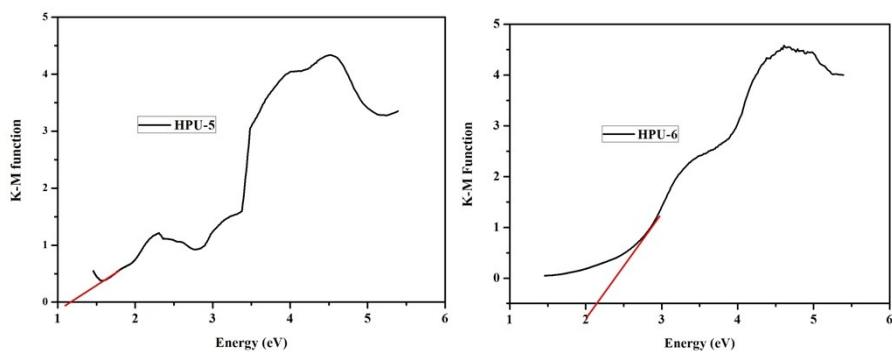

Figure S6 Kubelka-Munk-transformed diffuse reflectance of the two complexes.

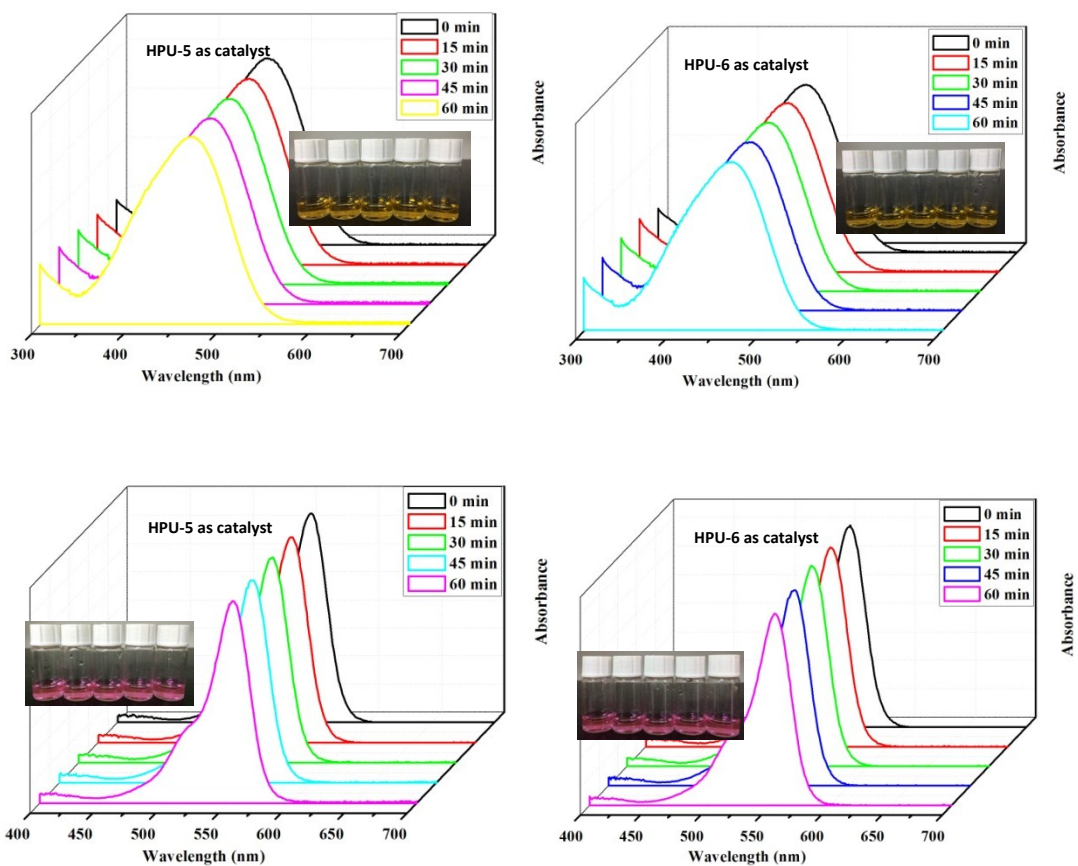

Figure S7 The time-dependent absorption spectra of MO and RhB using **HPU-5** and **HPU-6** as catalysts without UV light irradiation. Inset: the corresponding color variations of the supernatant solutions.

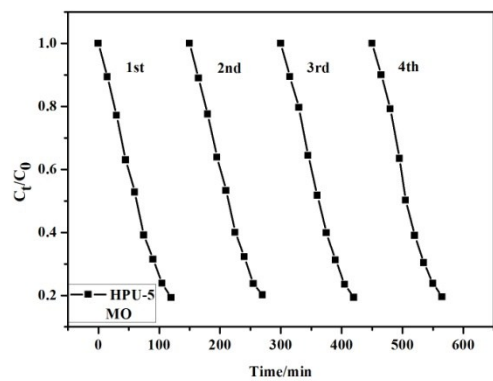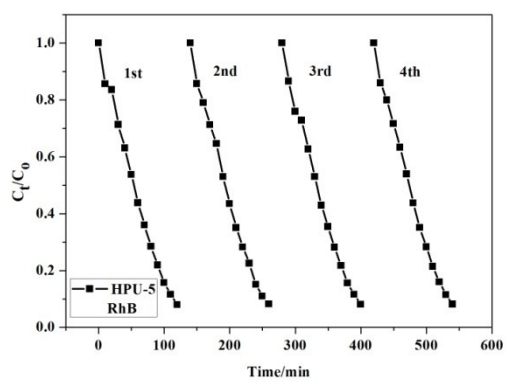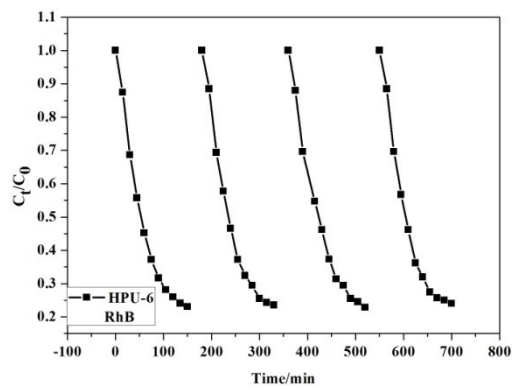

Figure S8 The recycle curves of HPU-5 and HPU-6.

Table S1 Selected bonds (Å) and angles (deg) for **HPU-5** and **HPU-6**.

| <b>HPU-5</b>         |            |                      |            |
|----------------------|------------|----------------------|------------|
| Co(1)-O(1)           | 2.007(3)   | Co(1)-O(2)#1         | 2.040(3)   |
| Co(1)-O(3)#2         | 2.143(3)   | Co(1)-N(1)#3         | 2.153(4)   |
| Co(1)-N(5)#4         | 2.185(4)   | Co(1)-O(4)#2         | 2.232(3)   |
| O(1)-Co(1)-O(2)#1    | 104.67(14) | O(1)-Co(1)-O(3)#2    | 156.38(14) |
| O(2)#1-Co(1)-O(3)#2  | 98.56(13)  | O(1)-Co(1)-N(1)#3    | 90.73(15)  |
| O(2)#1-Co(1)-N(1)#3  | 89.24(15)  | O(3)#2-Co(1)-N(1)#3  | 85.33(14)  |
| O(1)-Co(1)-N(5)#4    | 96.14(16)  | O(2)#1-Co(1)-N(5)#4  | 87.26(16)  |
| O(3)#2-Co(1)-N(5)#4  | 89.08(15)  | N(1)#3-Co(1)-N(5)#4  | 172.90(16) |
| O(1)-Co(1)-O(4)#2    | 96.55(13)  | O(2)#1-Co(1)-O(4)#2  | 158.77(14) |
| <b>HPU-6</b>         |            |                      |            |
| Mn(1)-O(3)           | 2.110(7)   | Mn(1)-O(21)          | 2.116(8)   |
| Mn(1)-O(6)           | 2.139(7)   | Mn(1)-O(7)#1         | 2.230(8)   |
| Mn(1)-N(10)#2        | 2.279(8)   | Mn(1)-O(8)#1         | 2.299(8)   |
| Mn(2)-O(4)           | 2.105(6)   | Mn(2)-O(5)           | 2.098(6)   |
| Mn(2)-N(5)#3         | 2.253(8)   | Mn(2)-O(2)#4         | 2.253(7)   |
| Mn(2)-N(13)#5        | 2.271(8)   | Mn(2)-O(1)#4         | 2.271(8)   |
| O(3)-Mn(1)-O(21)     | 88.8(4)    | O(3)-Mn(1)-O(6)      | 126.2(3)   |
| O(21)-Mn(1)-O(6)     | 86.2(3)    | O(3)-Mn(1)-O(7)#1    | 89.8(3)    |
| O(21)-Mn(1)-O(7)#1   | 93.4(4)    | O(6)-Mn(1)-O(7)#1    | 143.9(3)   |
| O(3)-Mn(1)-N(10)#2   | 86.4(3)    | O(21)-Mn(1)-N(10)#2  | 169.2(4)   |
| O(4)-Mn(2)-O(5)      | 122.6(3)   | O(4)-Mn(2)-N(5)#3    | 91.8(3)    |
| O(5)-Mn(2)-N(5)#3    | 86.3(3)    | O(4)-Mn(2)-O(2)#4    | 148.2(3)   |
| O(5)-Mn(2)-O(2)#4    | 89.2(3)    | N(5)#3-Mn(2)-O(2)#4  | 90.3(3)    |
| O(4)-Mn(2)-N(13)#5   | 91.9(3)    | O(5)-Mn(2)-N(13)#5   | 87.4(3)    |
| N(5)#3-Mn(2)-N(13)#5 | 173.7(3)   | O(2)#4-Mn(2)-N(13)#5 | 89.2(3)    |
| O(4)-Mn(2)-O(1)#4    | 90.6(3)    | N(5)#3-Mn(2)-O(1)#4  | 90.7(3)    |
| N(13)#5-Mn(2)-O(1)#4 | 94.4(3)    | O(5)-Mn(2)-O(1)#4    | 146.7(3)   |

Symmetry transformations used to generate equivalent atoms: **HPU-5**: #1 -x,-y+1,-z+2 #2 x-1,y,z #3 x-1,y,z+1 #4 x-1,y+1,z. **HPU-6**: #1 x-1,y,z #2 x,-y+1/2,z+1/2 #3 -x+2,-y,-z+1 #4 x+1,y,z #5 x,-y+1/2,z-1/2.
